# Supplementary material
Source: PubMed Central journal article supplement (PMC10362503)
Supplement: mmc4.pdf [file mmc4.pdf]

**Table S3:** List of primer sequences for SYBR Green method of gene expression.

Spot 14 5'-ATACCAGGAAATGACAGGGCAGGT-3' forward  
5'-ACCAAGTCCACAGATGCACTCAGA-3' reverse

Mig12 5'-TTTATCTGTGCTGCTGGAGGAGGT-3' forward  
5'-CTGCCCATTCCAGGTGCTCAATTT-3' reverse

Acc1 5'- TTTGCCTTCCGACATCCTGACGTA-3' forward  
5'-TCCAGGCTACCATGCCAATCTCAT-3' reverse

Citrate Lyase 5'- TTGGATGCCGCAGCAAAGATGTTC-3' forward  
5'- TTGAGGATCTGCACTCGCATGTCT-3' reverse

Hydroxy Acyl CoA (HACoA) 5'-ATGGCGTCCAGTGAGGAGGACGGC-3' forward  
5'-TTAATCGTCCTTCTCCGCGATC-3' reverse

Enoyl CoA hydratase (ECH1) 5'- GCTACCGCGATGACAGTTTC-3' forward  
5'- TCAGAGATCGAAGGCTGATGTT-3' reverse

Mouse Cpt1a, primers were purchased from BioRad.

Mouse PGDH (MP 201627) and PSPH (MP201727) primer pairs were purchase from Sino Biologicals Inc.
