# Supplementary material
Source: PubMed Central journal article supplement (PMC10362503)
Supplement: mmc6.pdf [file mmc6.pdf]

| Common Name                                                  | Abbreviation   |
|--------------------------------------------------------------|----------------|
| Acylceramides                                                | Acer           |
| Acyl Glucosyl Acylglycerols                                  | AcylGlcADG     |
| Bis(monoacylglycero)phosphates (lysobisphosphatidic acids)   | BMP            |
| Fatty acyl carnitines                                        | Car            |
| Cholesteryl esters                                           | CE             |
| Ceramides or ceramide phosphates                             | Cer            |
| Cardiolipins                                                 | CL             |
| Fatty acyl CoEnzyme A's                                      | CoA            |
| Diacylglycerol (Diglyceride)                                 | DG             |
| Diacylglyceryltrimethylhomoserine                            | DGTS           |
| Ceramide phosphoethanolamines                                | EPC            |
| Fatty acids and conjugates                                   | FA             |
| Mono- or digalactosyl mono- or diacylglycerols               | GalDG          |
| Hexosylceramides                                             | HexCer         |
| Ceramide phosphoinositol                                     | IPC            |
| Lysophosphatidic acid                                        | LPA            |
| Lysophosphatidylcholine                                      | LPC            |
| Lysophosphatidylethanolamine                                 | LPE            |
| Lysophosphatidylglycerol                                     | LPG            |
| Lysophosphatidylinositol                                     | LPI            |
| Lysophosphatidylserine                                       | LPS            |
| Monoacylglycerol (Monoglyceride)                             | MG             |
| Ceramide phosphoinositols                                    | MIPC           |
| N-acyl amines or taurines                                    | NA             |
| N-acyl ethanolamines (endocannabinoids)                      | NAE            |
| Others                                                       | Other          |
| Phosphatidic acid                                            | PA             |
| Phosphatidylcholines                                         | PC             |
| Phosphatidylethanolamines                                    | PE             |
| Phosphatidylglycerols                                        | PG             |
| Phosphatidylinositols                                        | PI             |
| Phosphatidylinositol-phosphates                              | PIP            |
| Prenols, polyketides, terpenes, flavonoids, and other lipids | PPKT, PR or PK |
| Phosphatidylserines                                          | PS             |
| Sulfoquinovosyldiacylglycerols                               | SDG            |
| Sphingomyelins                                               | SM             |
| Sphingoid bases or sphingoid base-phosphates                 | SPB            |
| Sterols                                                      | ST             |
| Sulfoglycosphingolipids (sulfatides)                         | Sulf           |
| Triacylglycerol                                              | TG             |

**Table S5.** List of abbreviations for the identified lipids in the study.
